# Supplementary material
Source: HighWire-hosted journal article supplement (https://www.cmaj.ca/highwire/filestream/58493/field_highwire_adjunct_files/1/analysissep26-online_appendix_2.pdf)
Supplement: analysissep26-online_appendix_2.pdf [file analysissep26-online_appendix_2.pdf]

**Appendix 2: Efficacy and cost-effectiveness of interventions for preventing and treating diabetes in developed countries**

| Strategy                                                                                             | Benefit                                                                                                       | Quality of evidence* | Cost-effectiveness ratio, in 2002 US\$ per QALY† | Reference‡                                                                            |
|------------------------------------------------------------------------------------------------------|---------------------------------------------------------------------------------------------------------------|----------------------|--------------------------------------------------|---------------------------------------------------------------------------------------|
| <b>Preventing type 2 diabetes</b>                                                                    |                                                                                                               |                      |                                                  |                                                                                       |
| Lifestyle interventions                                                                              | 35%-58% reduction in incidence of diabetes among people at high risk                                          | I                    | 1 100                                            | Diabetes Prevention Program Research Group <sup>1</sup>                               |
| Metformin therapy                                                                                    | 25%-31% reduction in incidence of diabetes among people at high risk                                          | I                    | 31 200                                           | Diabetes Prevention Program Research Group <sup>1</sup>                               |
| <b>Screening for undiagnosed type 2 diabetes in the general population</b>                           | 25% reduction in incidence of microvascular disease                                                           | III                  | 73 500                                           | CDC Diabetes Cost-Effectiveness Group <sup>2</sup>                                    |
| <b>Treating diabetes and its complications</b>                                                       |                                                                                                               |                      |                                                  |                                                                                       |
| Moderate glycemic control in people with HbA <sub>1c</sub> > 9%                                      | 30% reduction in incidence of microvascular disease per 1% drop in HbA <sub>1c</sub>                          | I                    | Cost saving                                      | CDC Diabetes Cost-Effectiveness Group <sup>2</sup>                                    |
| Intensive glycemic control (reduce HbA <sub>1c</sub> to < 8%) if HbA <sub>1c</sub> between 8% and 9% | 30% reduction in incidence of microvascular disease per 1% drop in HbA <sub>1c</sub>                          | I                    | 34 400                                           | CDC Diabetes Cost-Effectiveness Group <sup>2</sup>                                    |
| Blood pressure control if pressure > 160/95 mm Hg                                                    | 35% reduction in incidence of macrovascular and microvascular disease per 10 mm Hg drop in blood pressure     | I                    | Cost saving                                      | Klonoff and Schwartz; <sup>3</sup> CDC Diabetes Cost-Effectiveness Group <sup>2</sup> |
| Cholesterol control if total cholesterol > 200 mg/dL                                                 | 25%-55% reduction in rate of coronary artery disease events; 43% reduction in death rate                      | II-1                 | 63 200                                           | CDC Diabetes Cost-Effectiveness Group <sup>2</sup>                                    |
| Smoking cessation                                                                                    | 16% quitting rate                                                                                             | I                    | 12 500                                           | Earnshaw <sup>4</sup>                                                                 |
| Annual screening for microalbuminuria                                                                | 50% reduction in incidence of nephropathy (with ACE inhibitor use for identified cases)                       | III                  | 47 400                                           | Klonoff and Schwartz <sup>3</sup>                                                     |
| Annual eye examination                                                                               | 60%-70% reduction in incidence of serious vision loss                                                         | I                    | 6 000                                            | Klonoff and Schwartz; <sup>5</sup> Vijan et al <sup>6</sup>                           |
| Foot care in people at high risk of ulcers                                                           | 50%-60% reduction in incidence of serious foot disease                                                        | I                    | Cost saving                                      | Ragnarson and Apelqvist <sup>7</sup>                                                  |
| ASA use                                                                                              | 28% reduction in incidence of myocardial infarction; 18% reduction in incidence of cardiovascular disease     | I                    | NA                                               |                                                                                       |
| ACE inhibitor use                                                                                    | 42% reduction in incidence of nephropathy; 22% reduction in incidence of cardiovascular disease               | I                    | 8 800                                            | Golan et al <sup>8</sup>                                                              |
| Influenza vaccinations for elderly people with type 2 diabetes                                       | 32% reduction in hospital admissions; 64% reduction in combined incidence of respiratory conditions and death | II-2                 | 3 100                                            | Sorensen et al <sup>9</sup>                                                           |
| Preconception care for women of reproductive age                                                     | 30% reduction in hospital charges; 25% reduction in hospital days                                             | II-2                 | Cost saving                                      | Klonoff and Schwartz <sup>3</sup>                                                     |

Note: NA = not available, ACE = angiotensin-converting enzyme.

\*I = evidence from at least one randomized controlled trial, II-1 = evidence from a well-designed, controlled trial without randomization; II-2 = evidence from cohort or case-control studies; II-3 = evidence from multiple time series; III = opinions of respected authorities.<sup>10</sup>

†Cost-effectiveness ratios were adjusted to 2002 US dollars using the consumer price index for medical care. In cases where there were multiple studies evaluating the cost-effectiveness of an intervention, the median cost-effectiveness ratio is reported.

‡See next page for the list of references.

**References**

1. Herman WH, Hoerger TJ, Brandle M, et al; Diabetes Prevention Program Research Group. The cost-effectiveness of lifestyle modification or metformin in preventing type 2 diabetes in adults with impaired glucose tolerance. *Ann Intern Med* 2005;142:323-32.
2. CDC Diabetes Cost-Effectiveness Group. Cost-effectiveness of intensive glycemic control, intensified hypertension control, and serum cholesterol level reduction for type 2 diabetes. *JAMA* 2002;287:2542-51.
3. Klonoff DC, Schwartz DM. An economic analysis of interventions for diabetes. *Diabetes Care* 2000;23:390-404
4. Earnshaw SR, Richter A, Sorensen SW, et al. Optimal allocation of resources across four interventions for type 2 diabetes. *Med Decis Making* 2002;22(5 Suppl):S80-91.
5. World Health Organization. *Global burden of disease for the year 2001 by World Bank region, for use in disease control priorities in developing countries*. 2nd ed. Geneva: World Health Organization; 2002.
6. Vijan S, Hofer TP, Hayward RA. Cost-utility analysis of screening intervals for diabetic retinopathy in patients with type 2 diabetes mellitus. *JAMA* 2000;283:889-96.
7. Ragnarson TG, Apelqvist J. Prevention of diabetes-related foot ulcers and amputations: a cost-utility analysis based on Markov model simulations. *Diabetologia* 2001;44:2077-87.
8. Golan L, Birkmeyer JD, Welch HG. The cost-effectiveness of treating all patients with type 2 diabetes with angiotensin-converting enzyme inhibitors. *Ann Intern Med* 1999;131:660-7.
9. Sorensen S, Engelgau M, Hoerger T, et al. Assessment of the benefits from a polypill to reduce cardiovascular disease among persons with type 2 diabetes mellitus [poster presentation]. 64th annual scientific sessions of American Diabetes Association; 2004 Jun 4-8; Orlando.
10. *Guide to clinical preventive services. Report of the US Preventive Services Task Force*. Washington: US Department of Health and Human Services, Office of Public Health and Science, Office of Disease Prevention and Health Promotion; 1996. Appendix A.
